# Supplementary material
Source: MDPI journal article supplement (https://www.mdpi.com/2073-4344/12/10/1278)

## *Supplementary Materials*

### **Selective C-O coupling reaction of *N*-methoxy arylamides and arylboric acids catalyzed by copper salt**

Ying Wang, Huilin Xie, Kunming Liu \*, Jinhui Li \*, Jin-Biao Liu \*

Jiangxi Provincial Key Laboratory of Functional Molecular Materials Chemistry, Jiangxi  
University of Science and Technology, 86 Hongqi Road, Ganzhou 341000, China. E-mail addresses:  
liukunming@jxust.edu.cn (K. Liu), liujinbiao@jxust.edu.cn (J.-B. Liu).

---

## Table of contents

|                                                                  |    |
|------------------------------------------------------------------|----|
| 1. The $^1\text{H}$ and $^{13}\text{C}$ NMR spectra of compounds | 1  |
| 2. The HRMS Spectra of representative Compounds                  | 17 |

# 1. The $^1\text{H}$ and $^{13}\text{C}$ NMR Spectra of Compounds **3a-3z**.

## $^1\text{H}$ NMR spectrum (400 MHz, $\text{CDCl}_3$ ) of compound 3a

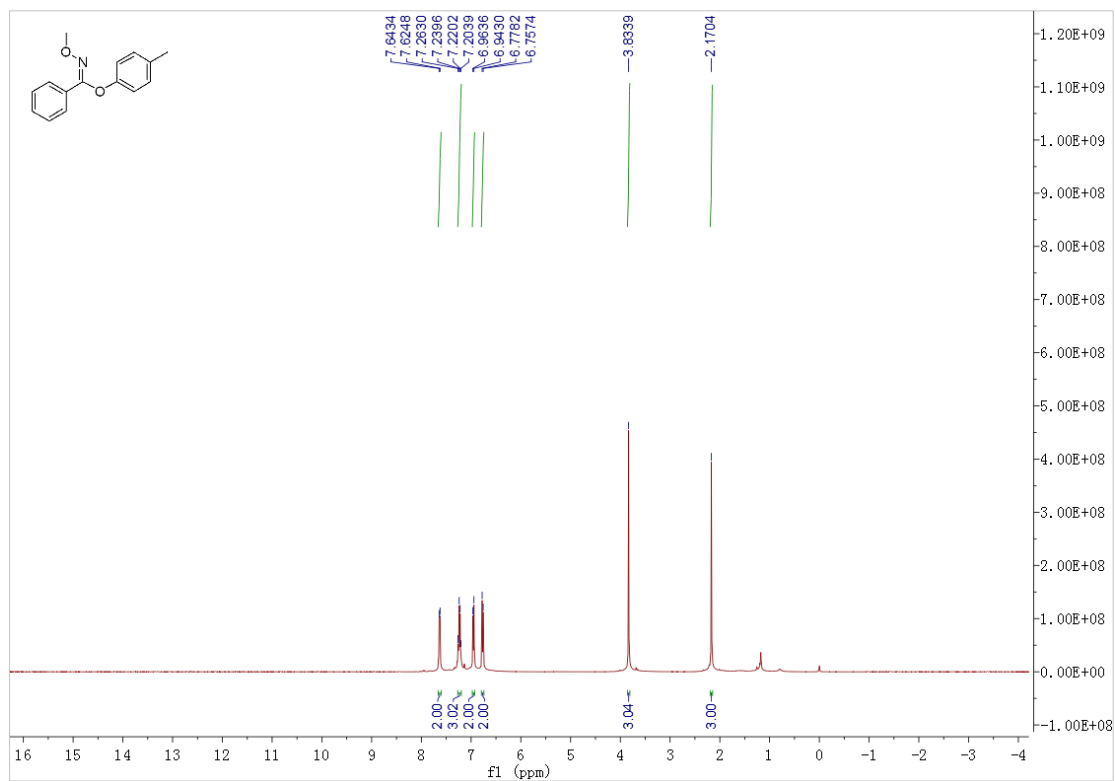

## $^{13}\text{C}$ NMR spectrum (400 MHz, $\text{CDCl}_3$ ) of compound 3a

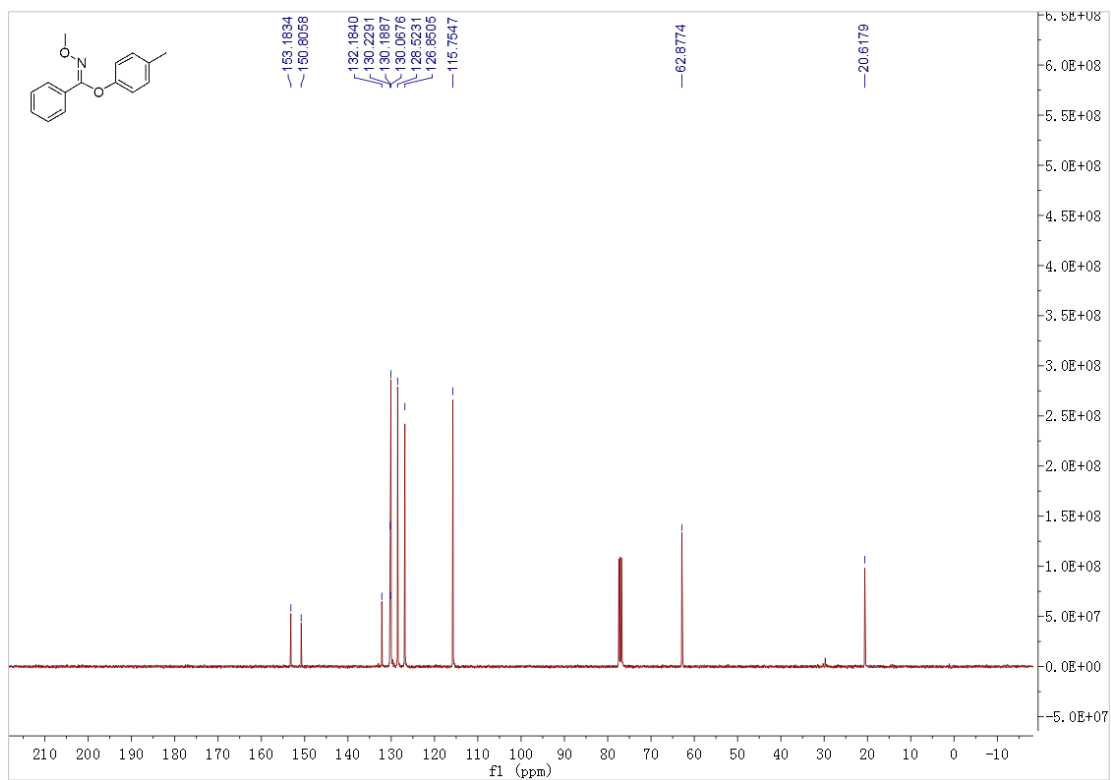

**<sup>1</sup>H NMR spectrum (400 MHz, CDCl<sub>3</sub>) of compound 3b**

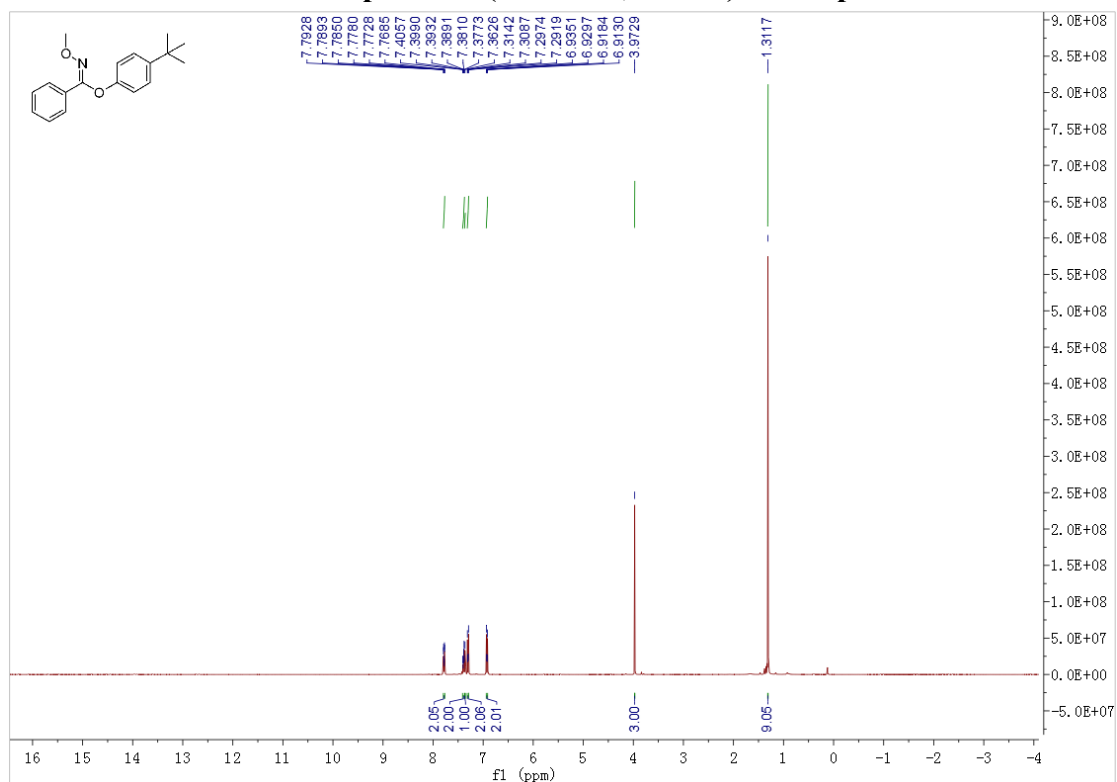

**<sup>13</sup>C NMR spectrum (400 MHz, CDCl<sub>3</sub>) of compound 3b**

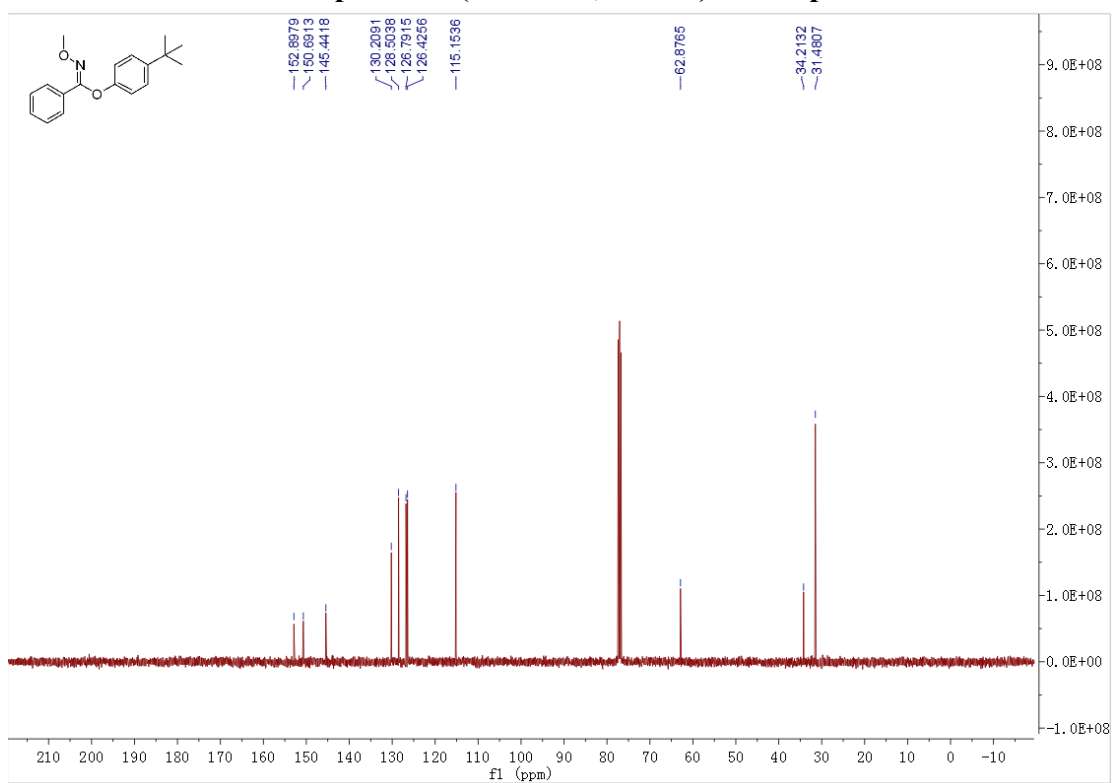

**<sup>1</sup>H NMR spectrum (400 MHz, CDCl<sub>3</sub>) of compound 3c**

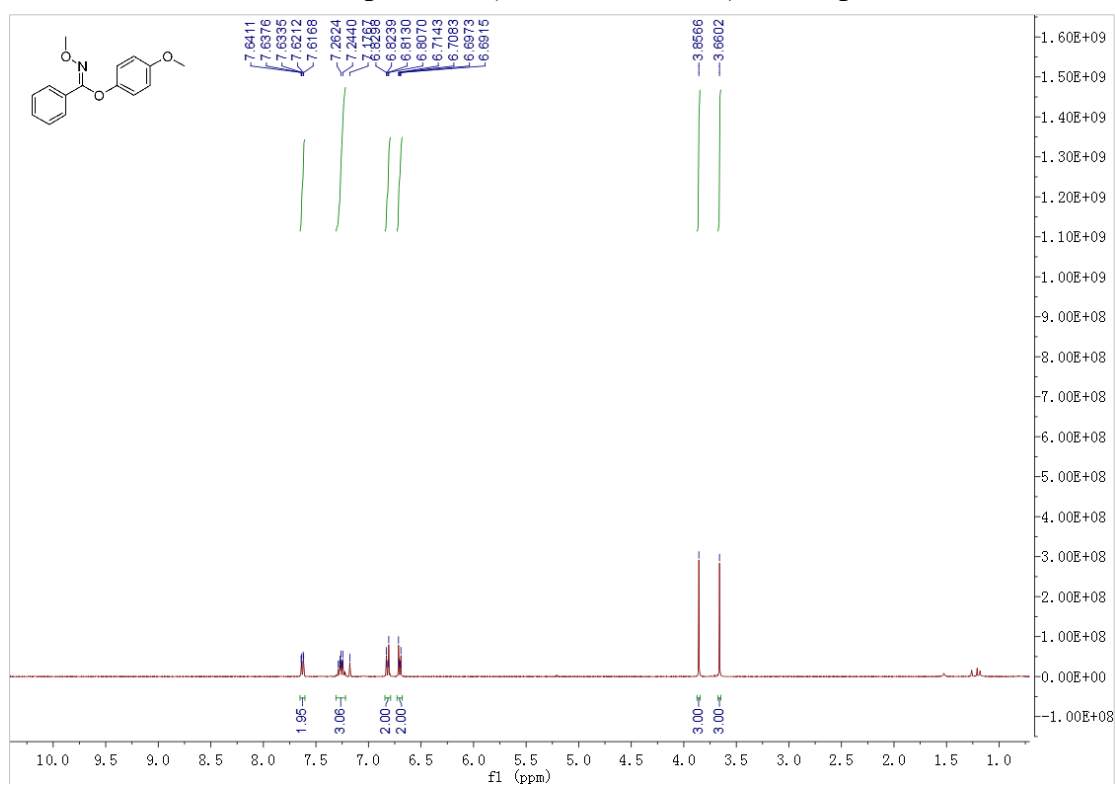

**<sup>13</sup>C NMR spectrum (400 MHz, CDCl<sub>3</sub>) of compound 3c**

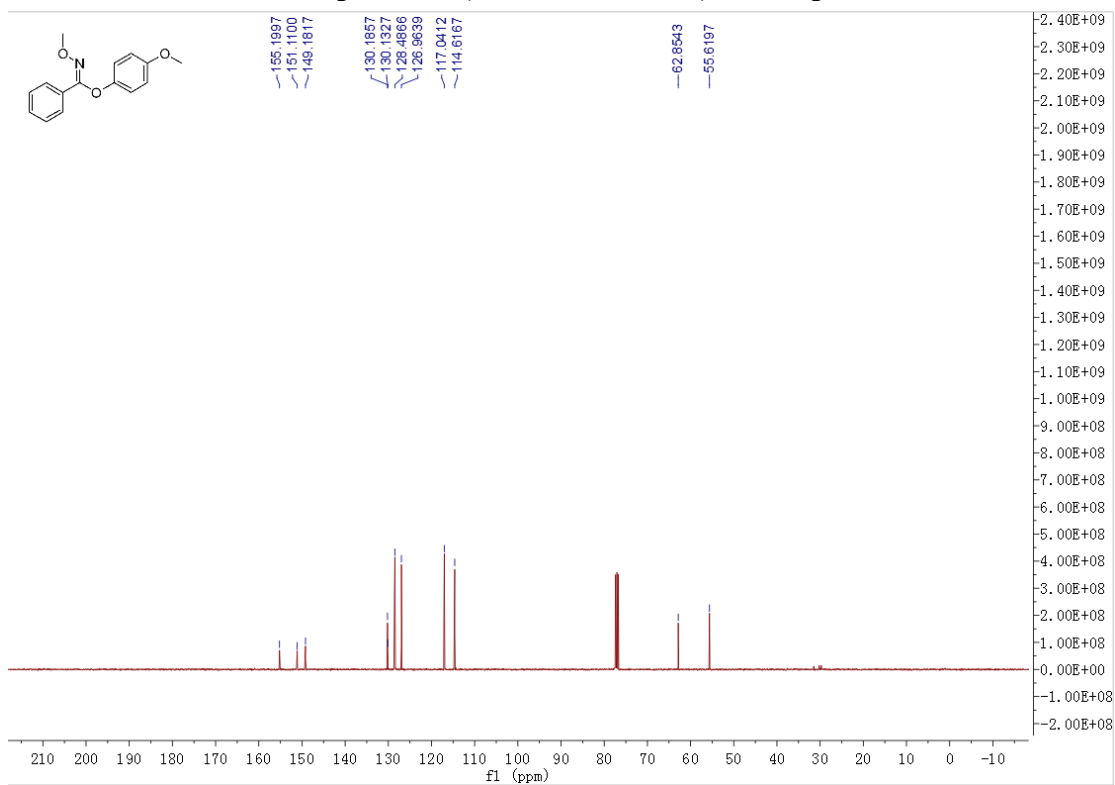

**$^1\text{H}$  NMR spectrum (400 MHz,  $\text{CDCl}_3$ ) of compound 3d**

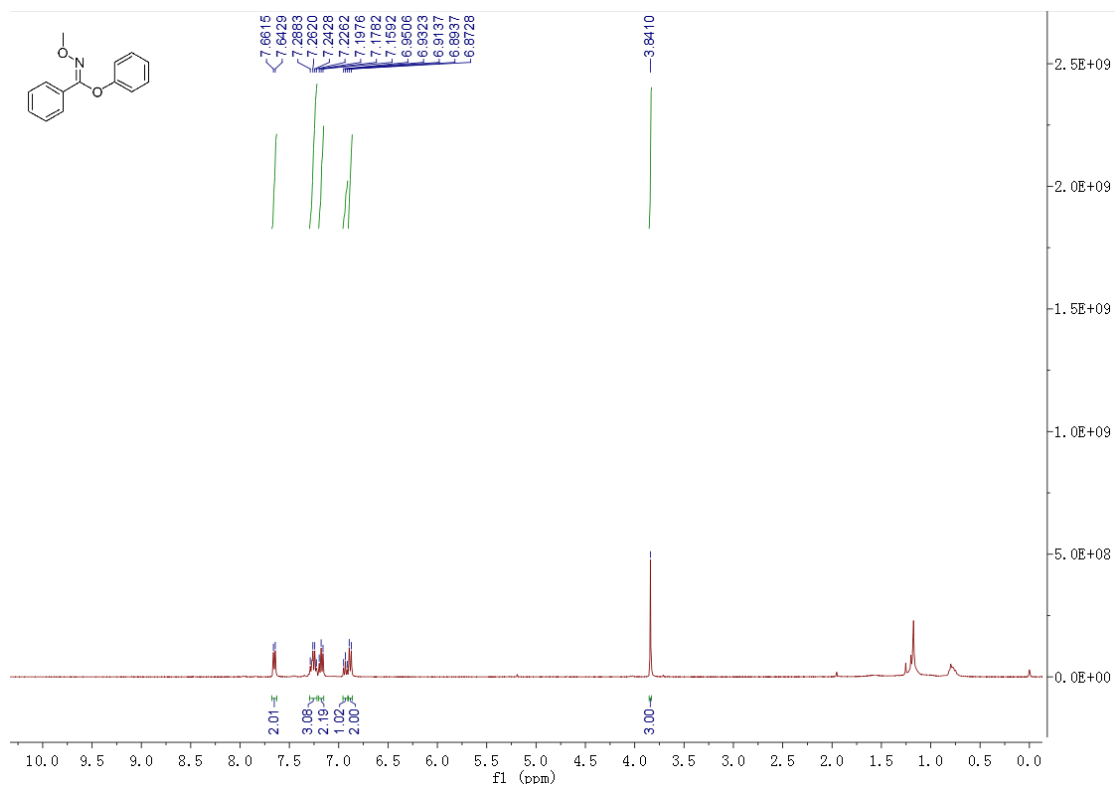

**$^{13}\text{C}$  NMR spectrum (400 MHz,  $\text{CDCl}_3$ ) of compound 3d**

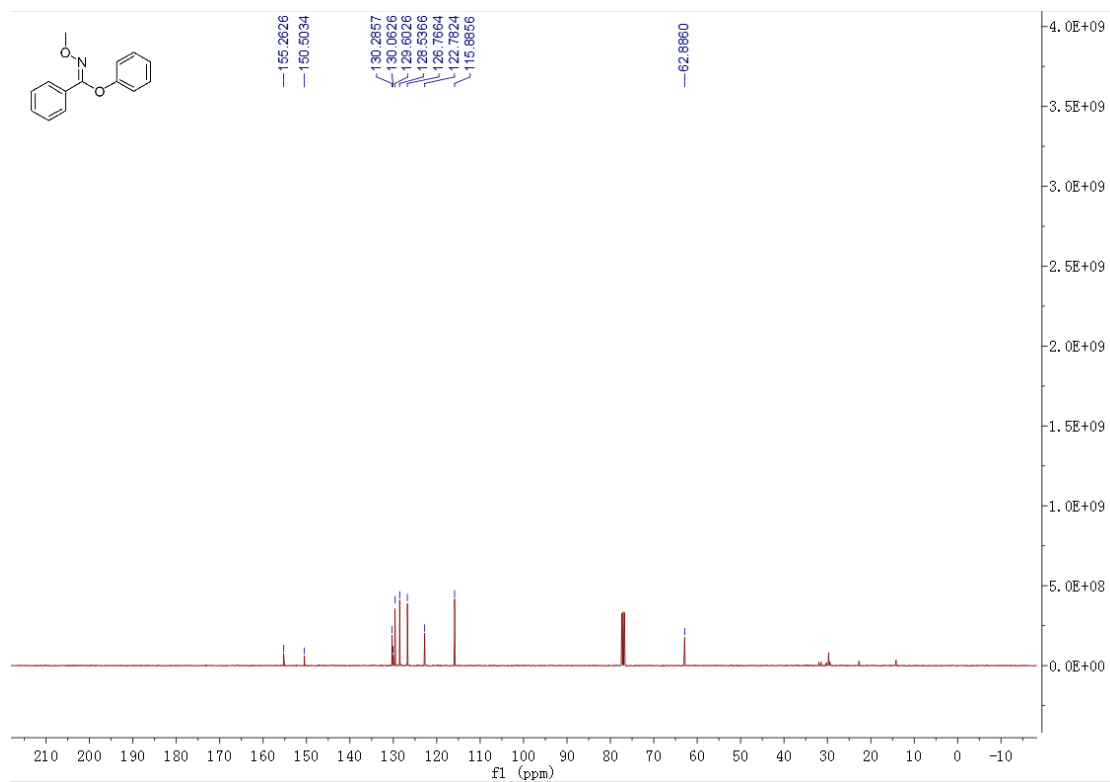

**<sup>1</sup>H NMR spectrum (400 MHz, CDCl<sub>3</sub>) of compound **3g****

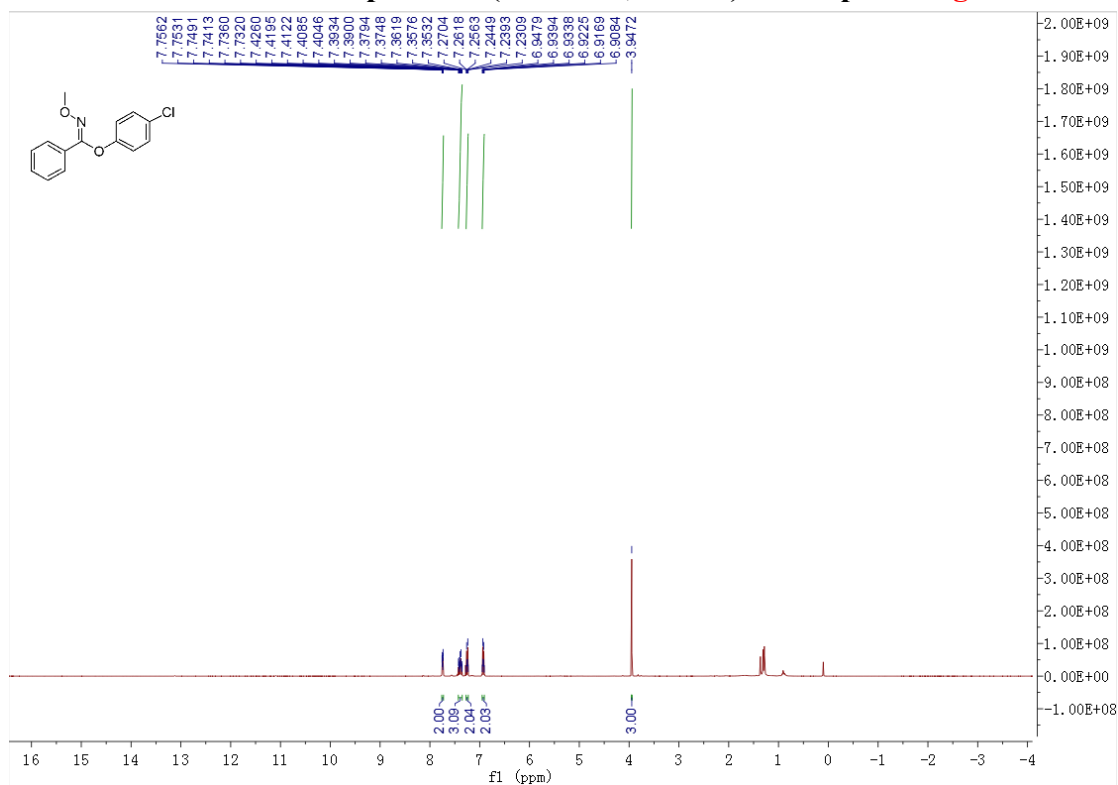

**<sup>13</sup>C NMR spectrum (400 MHz, CDCl<sub>3</sub>) of compound **3g****

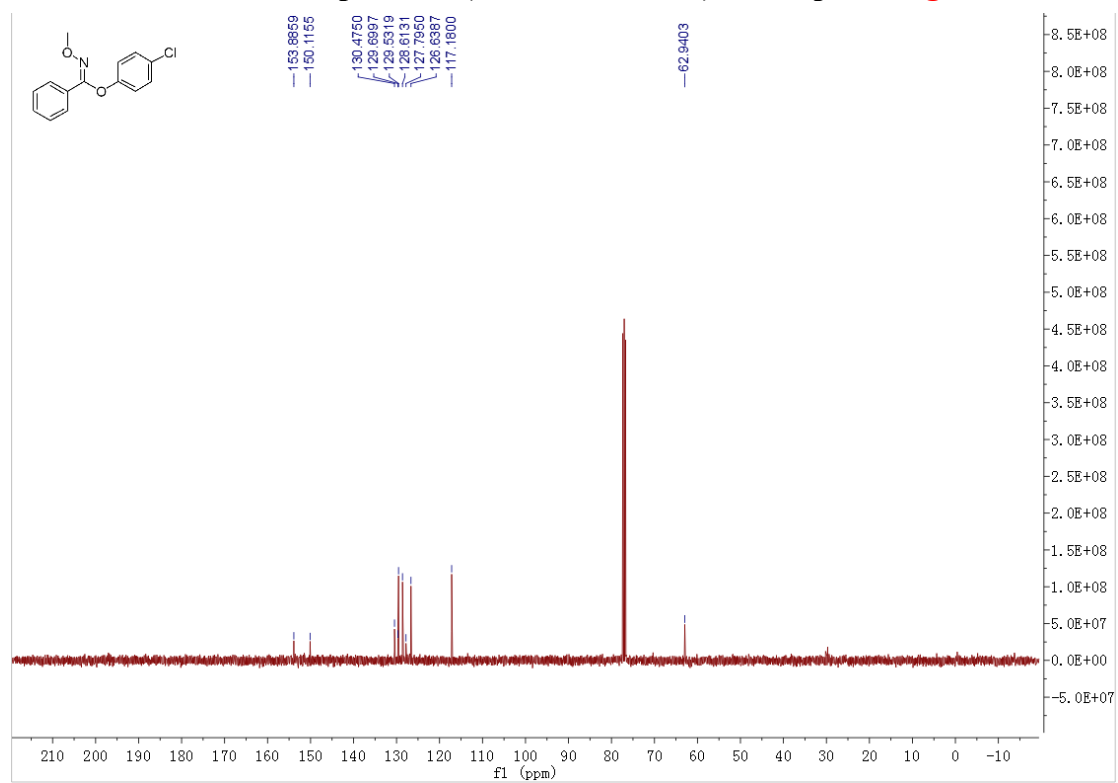

**<sup>1</sup>H NMR spectrum (400 MHz, CDCl<sub>3</sub>) of compound **3h****

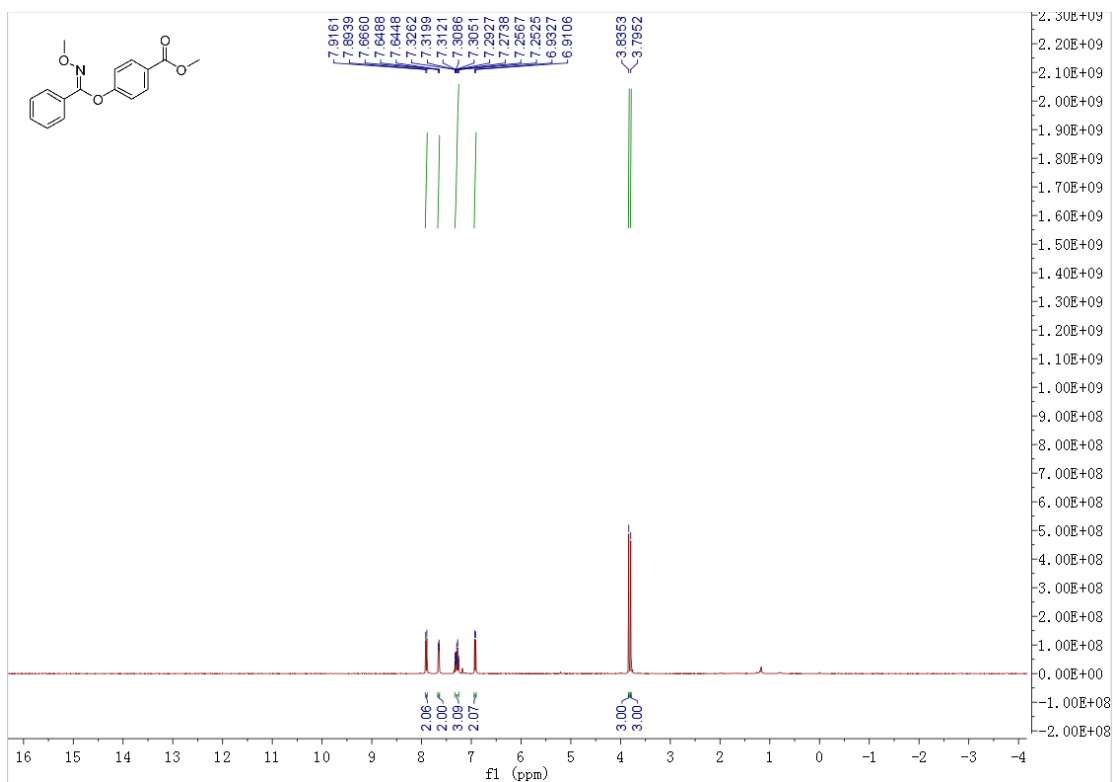

**<sup>13</sup>C NMR spectrum (400 MHz, CDCl<sub>3</sub>) of compound **3h****

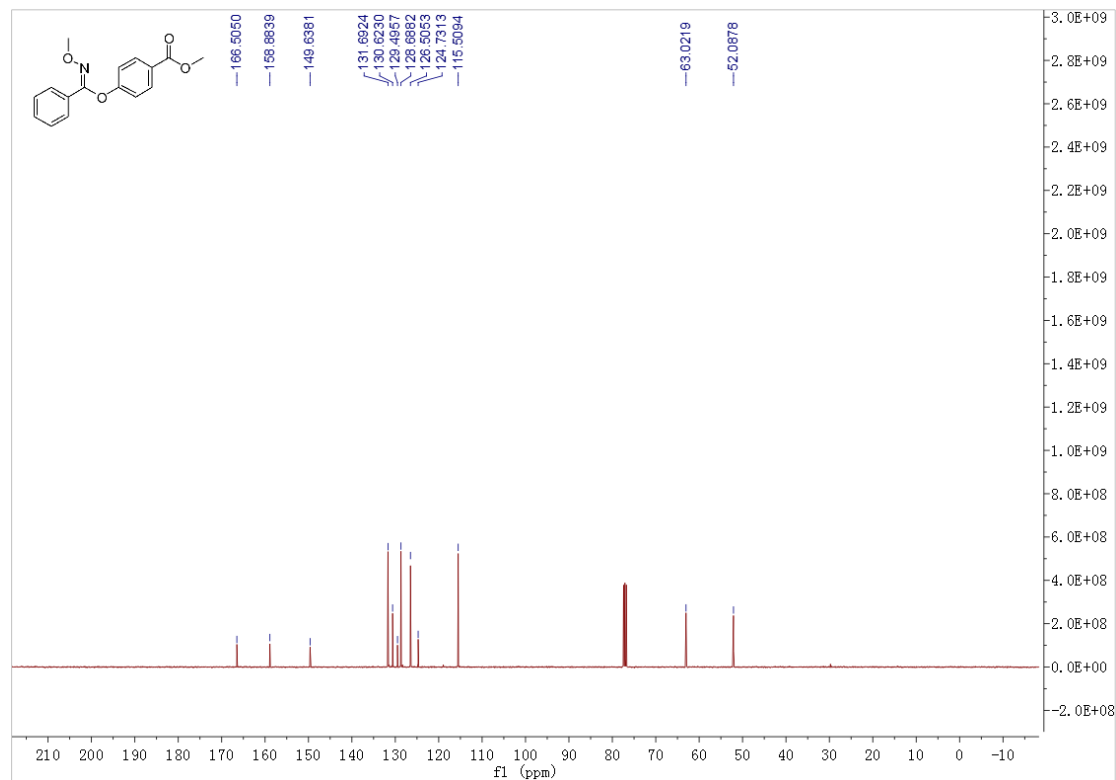



**<sup>1</sup>H NMR spectrum (400 MHz, CDCl<sub>3</sub>) of compound **3k****

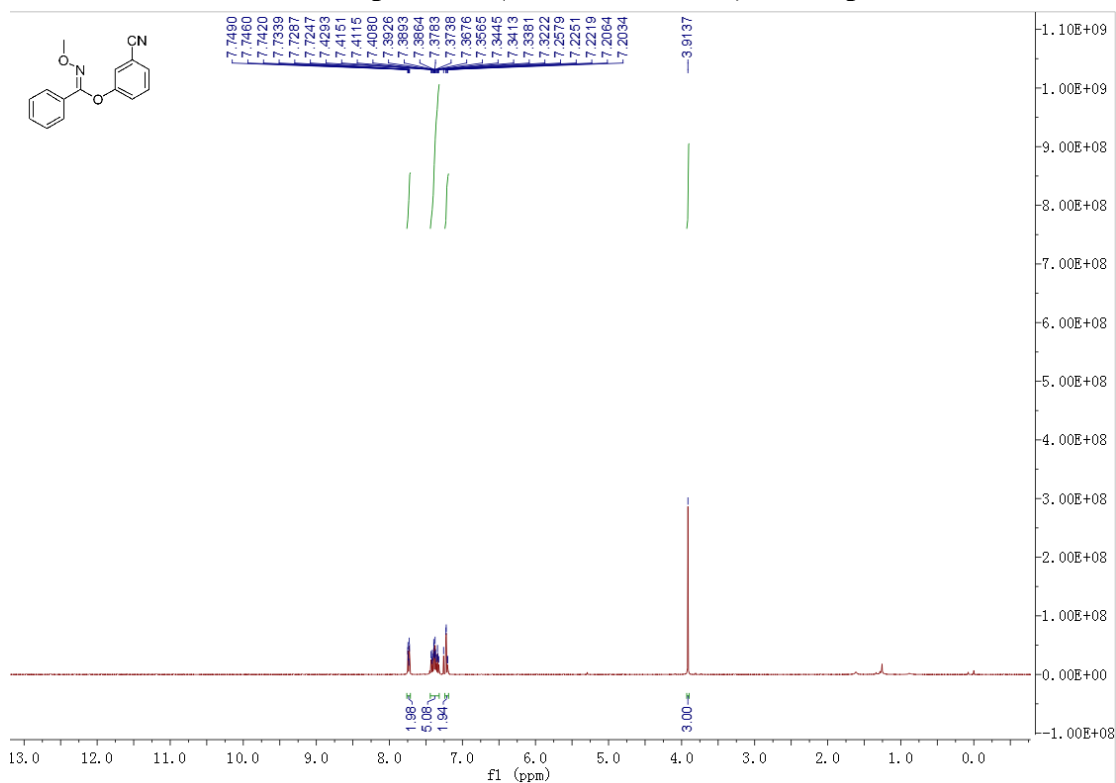

**<sup>13</sup>C NMR spectrum (400 MHz, CDCl<sub>3</sub>) of compound **3k****

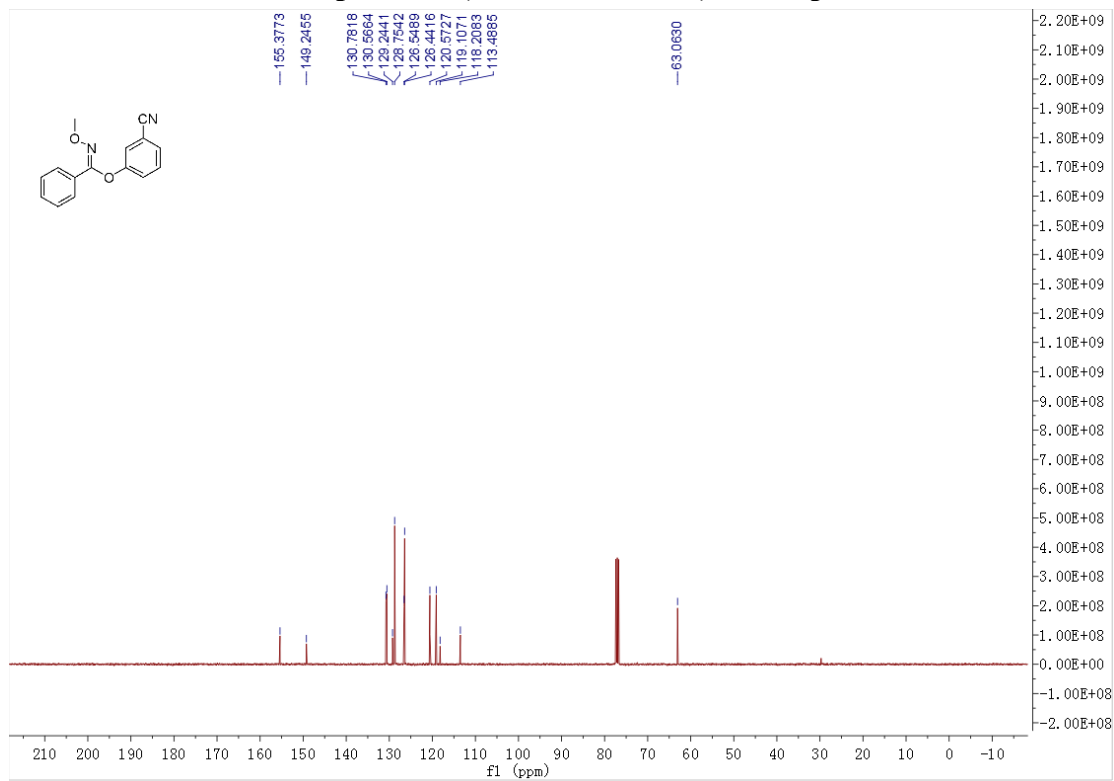

**<sup>1</sup>H NMR spectrum (400 MHz, CDCl<sub>3</sub>) of compound **31****

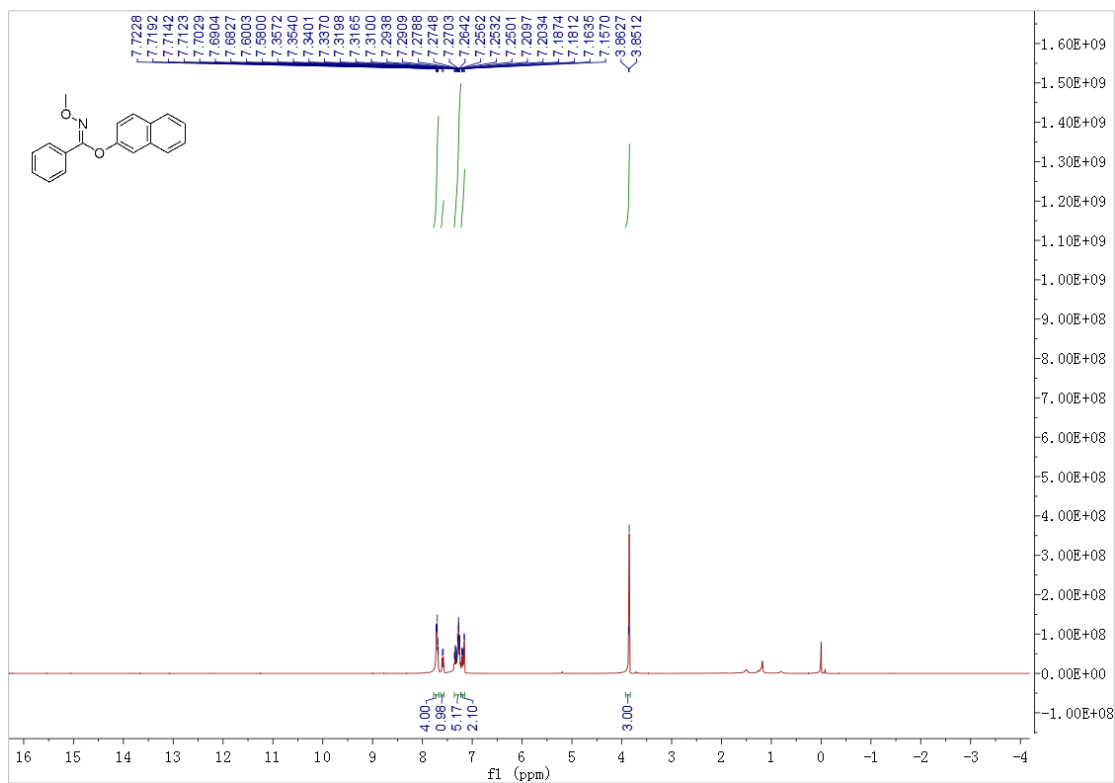

**<sup>13</sup>C NMR spectrum (400 MHz, CDCl<sub>3</sub>) of compound **31****

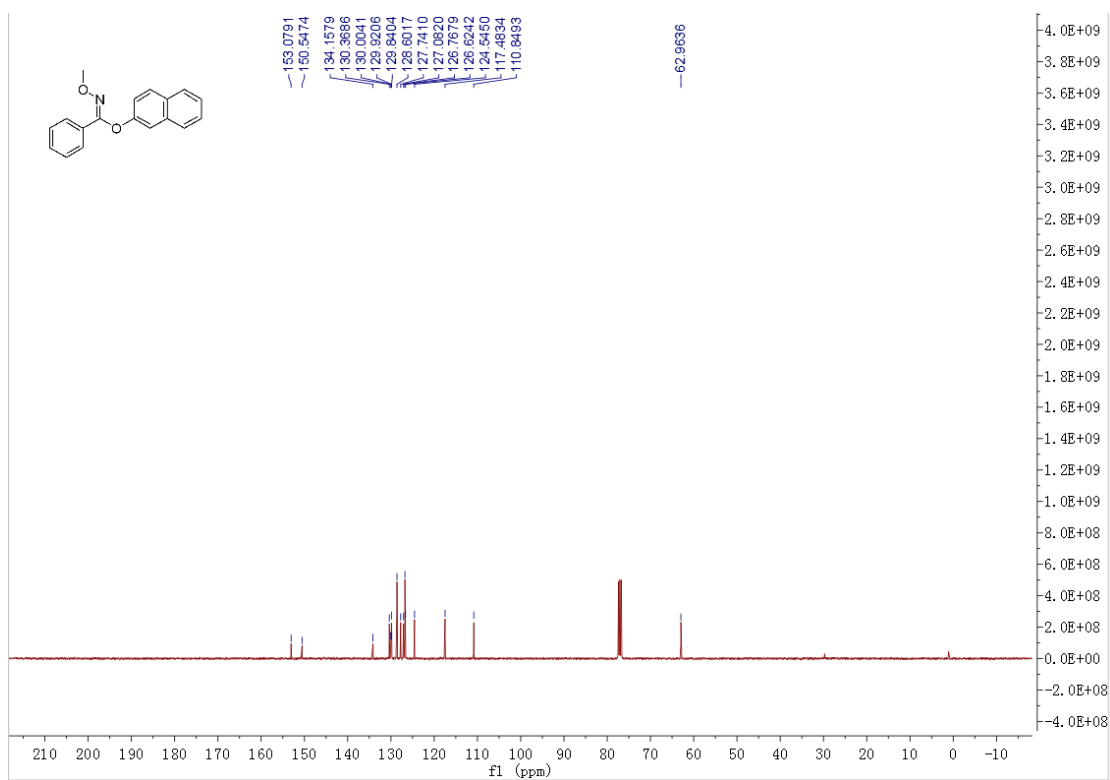

**<sup>1</sup>H NMR spectrum (400 MHz, CDCl<sub>3</sub>) of compound **3o****

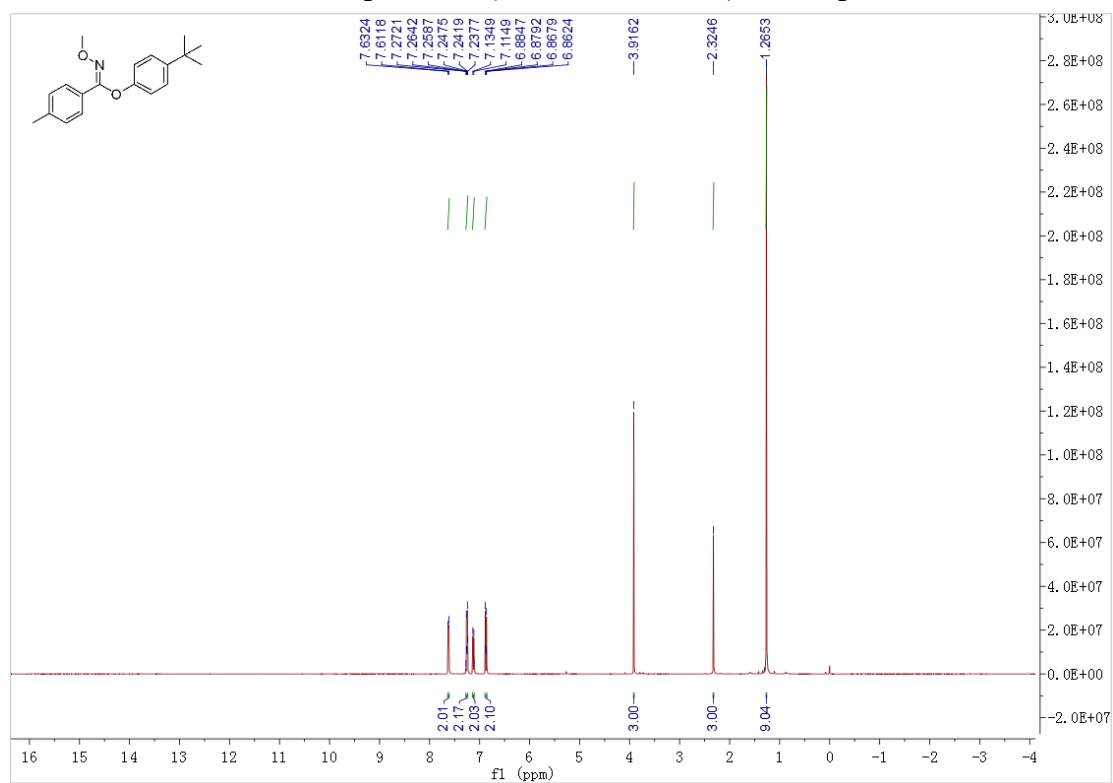

**<sup>13</sup>C NMR spectrum (400 MHz, CDCl<sub>3</sub>) of compound **3o****

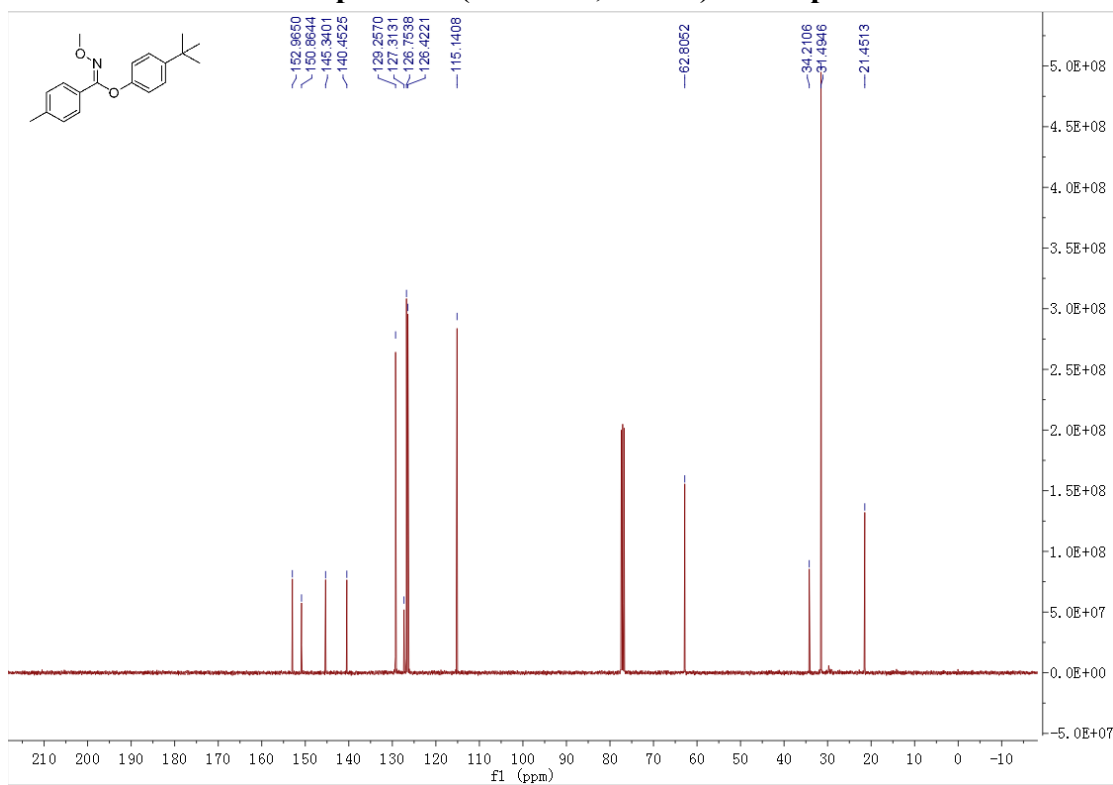

**<sup>1</sup>H NMR spectrum (400 MHz, CDCl<sub>3</sub>) of compound **3p****

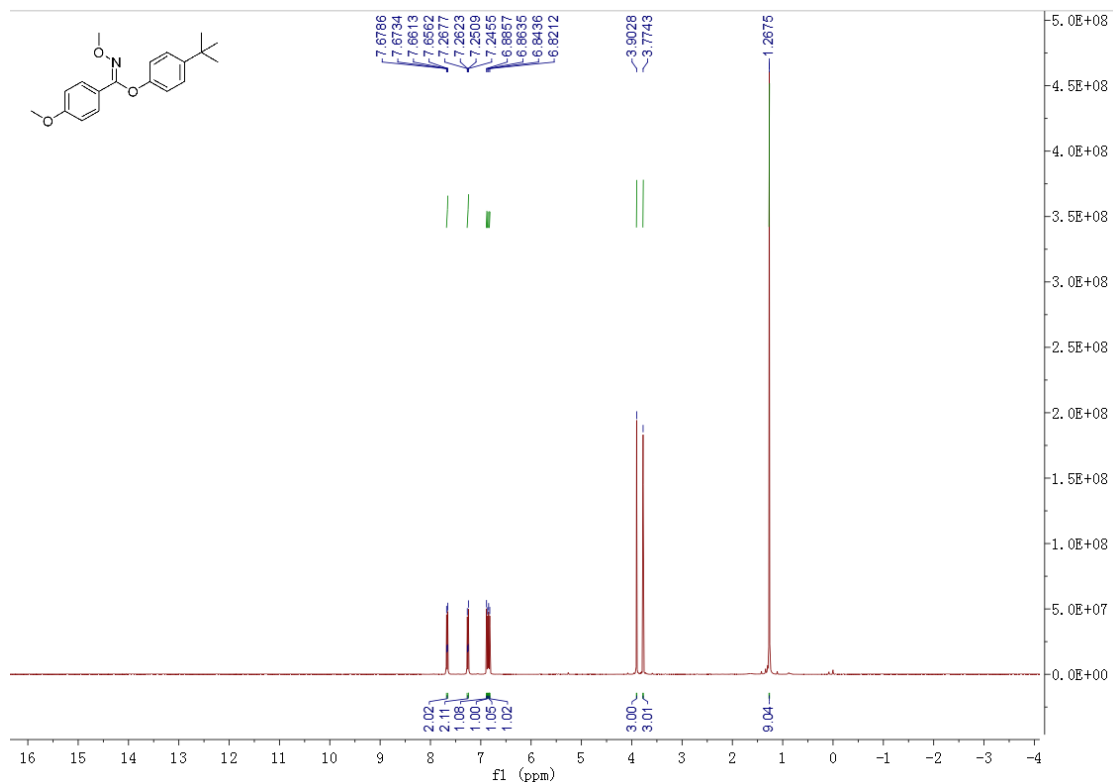

**<sup>13</sup>C NMR spectrum (400 MHz, CDCl<sub>3</sub>) of compound **3p****

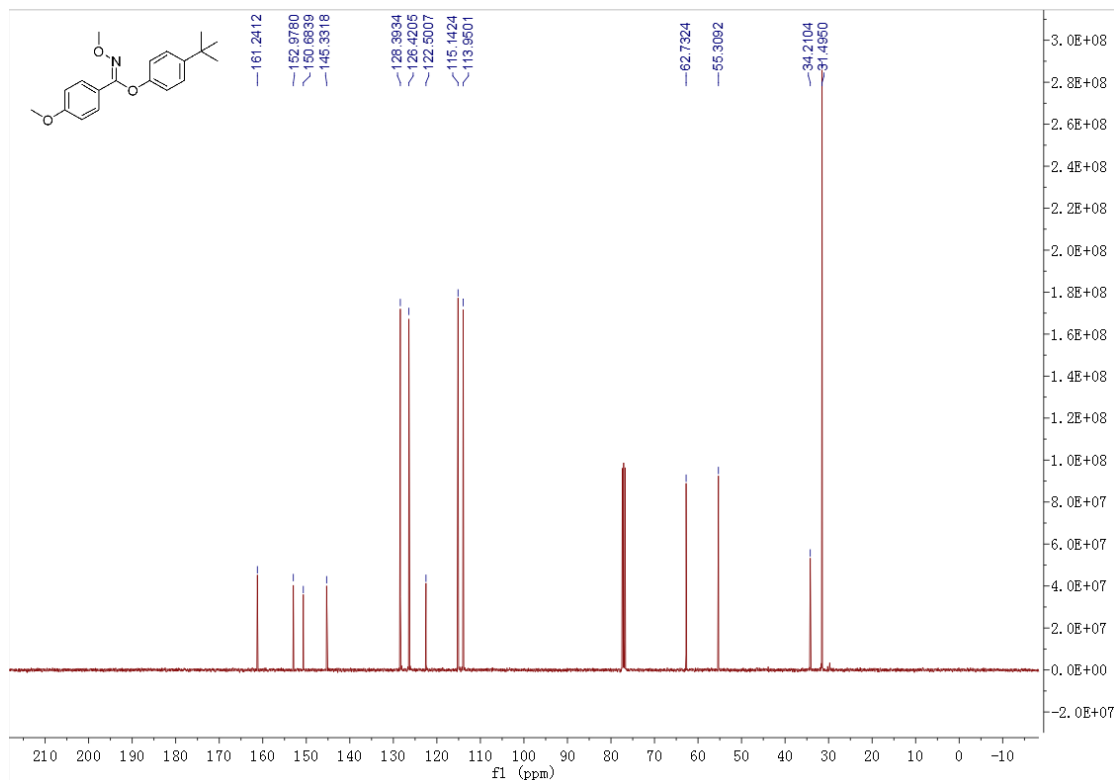

**<sup>1</sup>H NMR spectrum (400 MHz, CDCl<sub>3</sub>) of compound **3r****

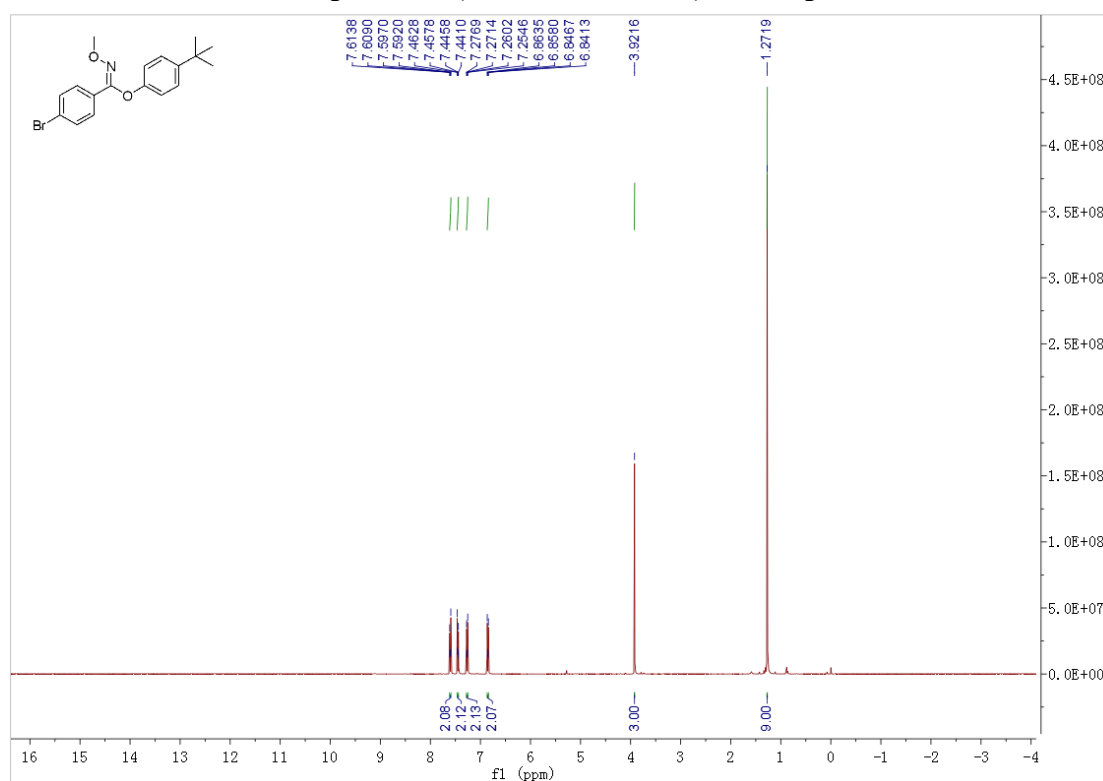

**<sup>13</sup>C NMR spectrum (400 MHz, CDCl<sub>3</sub>) of compound **3r****

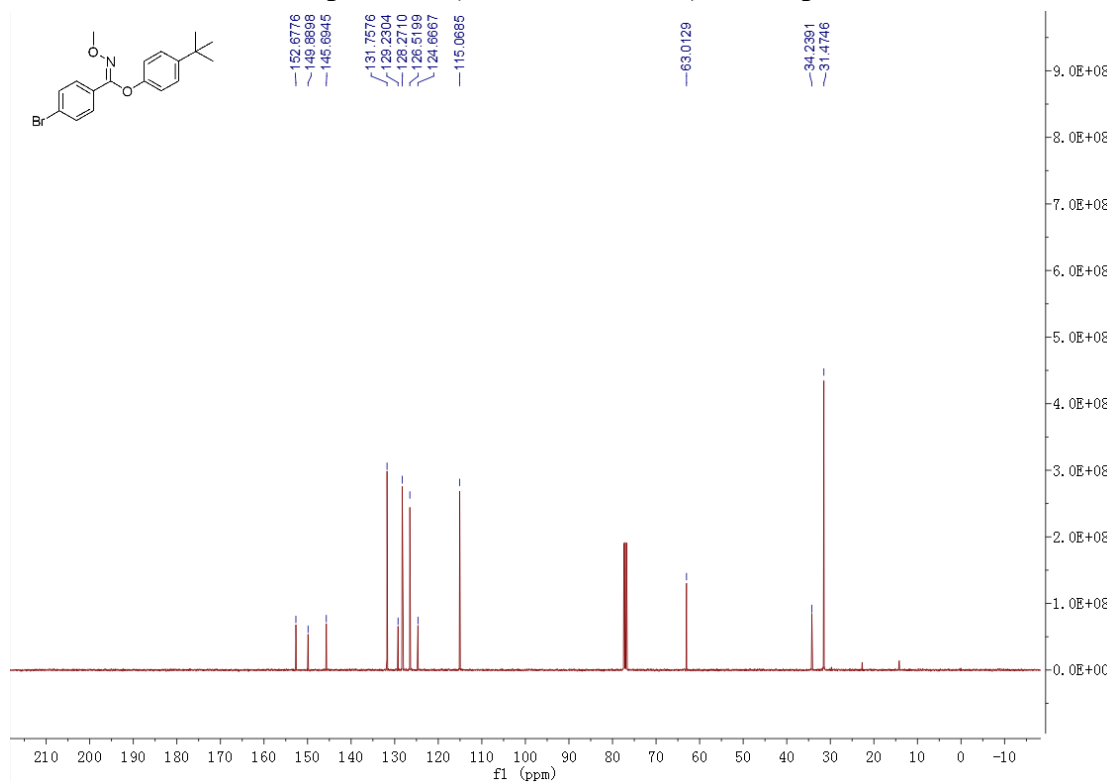

**<sup>1</sup>H NMR spectrum (400 MHz, CDCl<sub>3</sub>) of compound **3s****

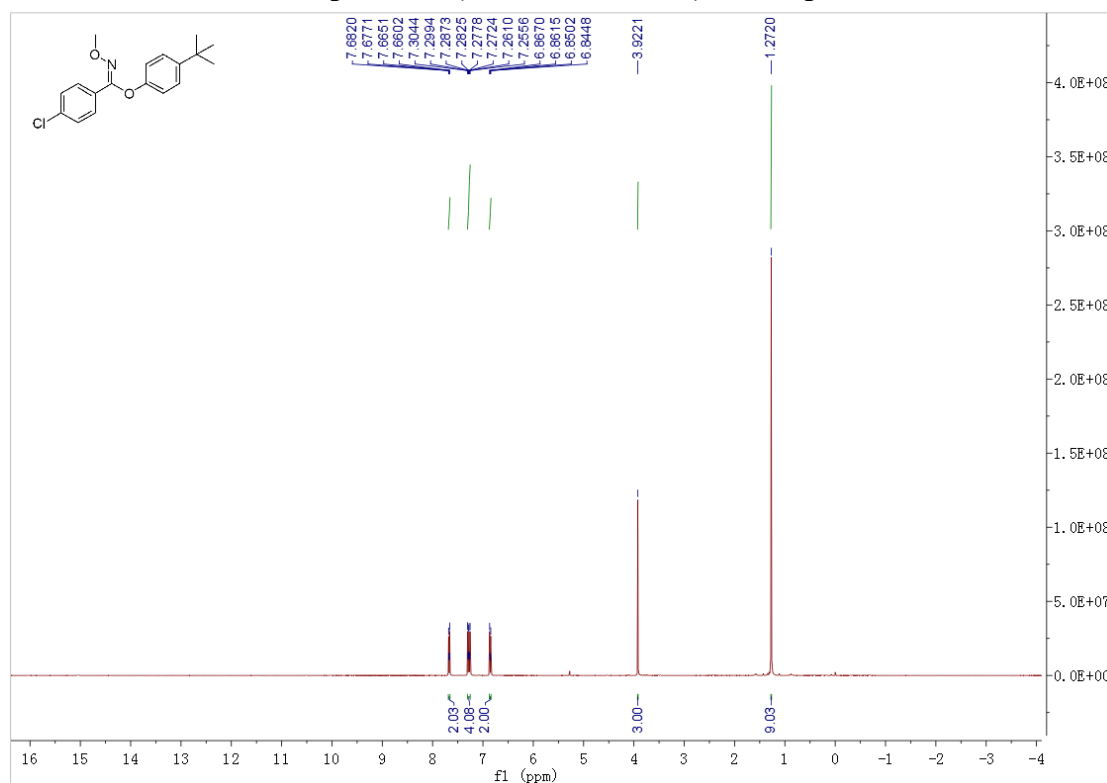

**<sup>13</sup>C NMR spectrum (400 MHz, CDCl<sub>3</sub>) of compound **3s****

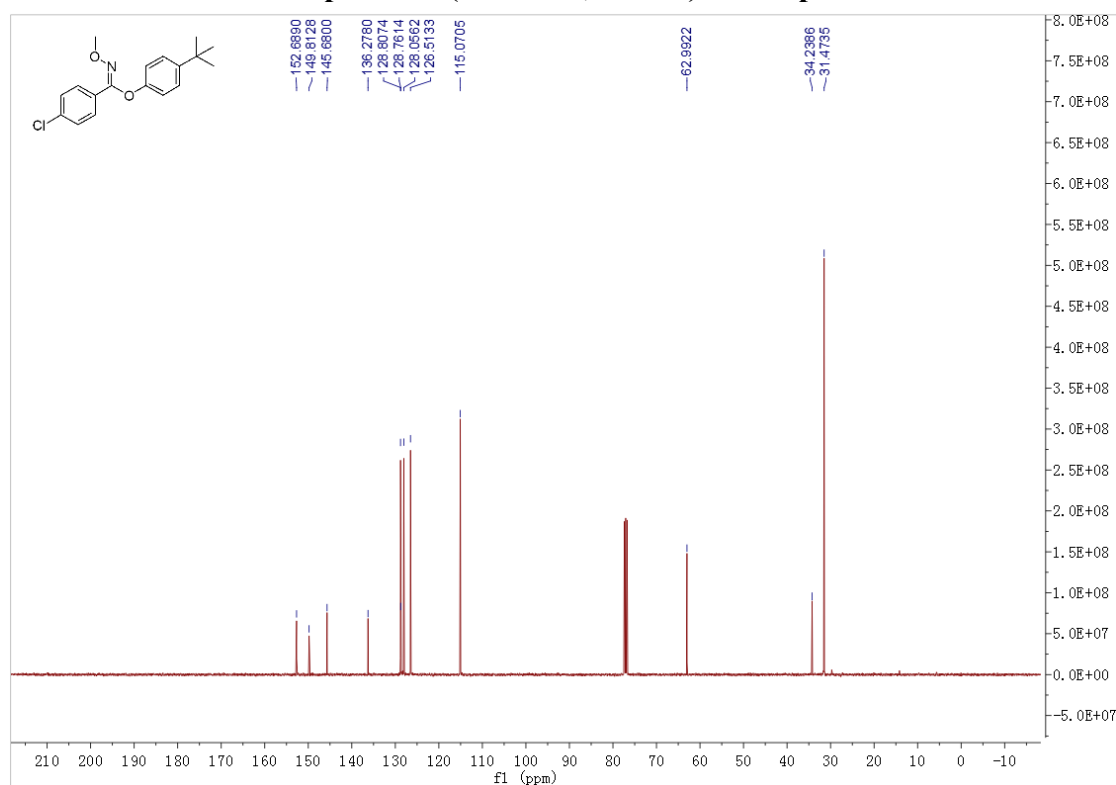

COc1ccc(cc1)C(=O)Nc2ccc(F)cc2

Chemical structure: 4-(4-fluorophenyl)-N-methoxy-N-(4-tert-butylphenyl)benzamide.

<sup>1</sup>H NMR spectrum (CDCl<sub>3</sub>) showing peaks in the aromatic region (6.5-7.8 ppm), a methoxy singlet (~3.9 ppm), and a tert-butyl singlet (~1.3 ppm). Integration values are provided for each peak group.

| Chemical Shift (ppm)                                                                                                                                                   | Integration            |
|------------------------------------------------------------------------------------------------------------------------------------------------------------------------|------------------------|
| 7.7433, 7.7378, 7.7299, 7.7208, 7.7129, 7.7073, 7.2763, 7.2728, 7.2616, 7.2560, 7.0248, 7.0195, 7.0016, 6.9932, 6.9844, 6.9865, 6.9811, 6.9760, 6.9704, 6.9592, 6.9537 | 2.01, 2.00, 2.04, 2.00 |
| 3.9131                                                                                                                                                                 | 3.00                   |
| 1.2710                                                                                                                                                                 | 9.01                   |

Chemical structure: COc1ccc(cc1)C(=O)Oc2ccc(cc2)C(C)(C)C

<sup>13</sup>C NMR spectrum (ppm):

- 165.2410
- 162.7504
- 152.7416
- 149.8707
- 145.6215
- 128.6836
- 128.7980
- 126.4884
- 126.3856
- 126.3552
- 115.7713
- 115.5535
- 115.1122
- 62.8939
- 34.2319
- 31.4742

**<sup>1</sup>H NMR spectrum (400 MHz, CDCl<sub>3</sub>) of compound **3u****

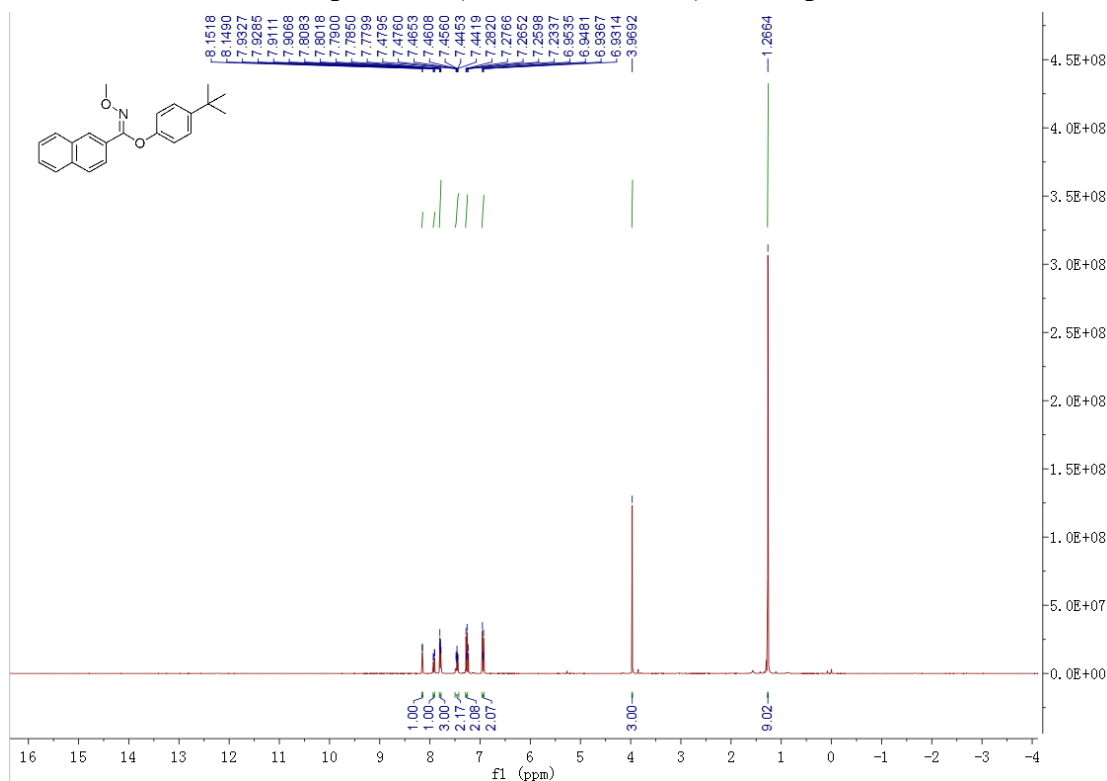

**<sup>13</sup>C NMR spectrum (400 MHz, CDCl<sub>3</sub>) of compound **3u****

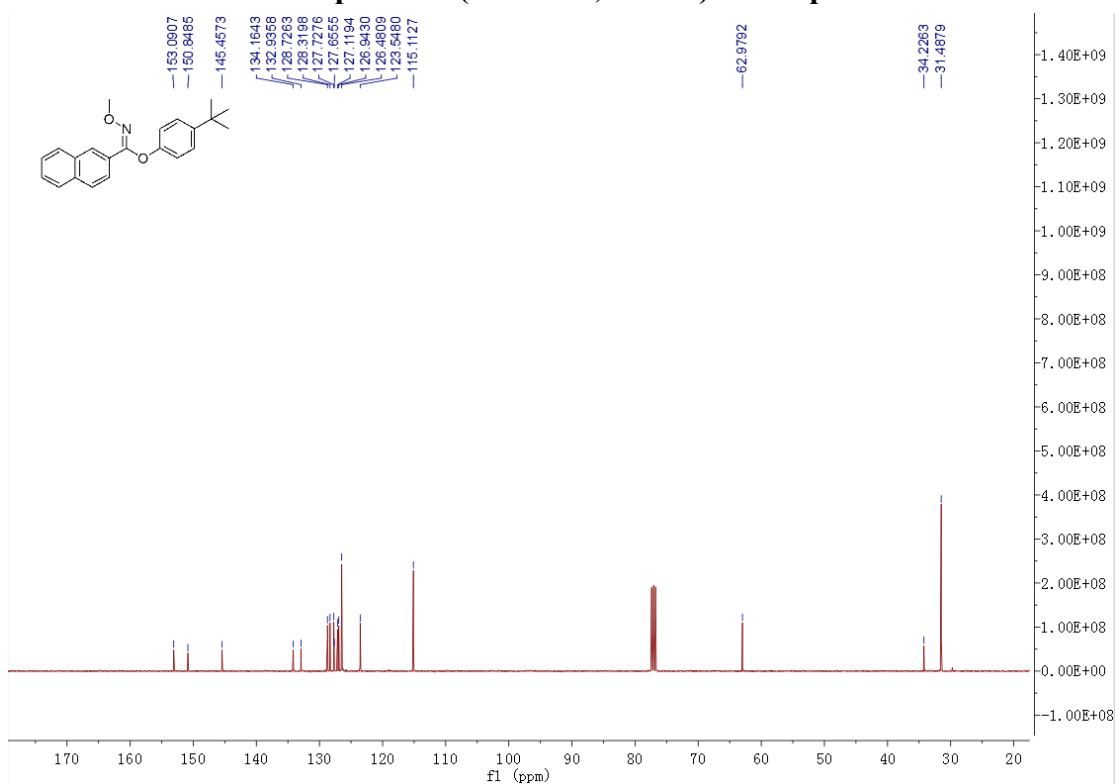



**<sup>1</sup>H NMR spectrum (400 MHz, CDCl<sub>3</sub>) of compound **3v****

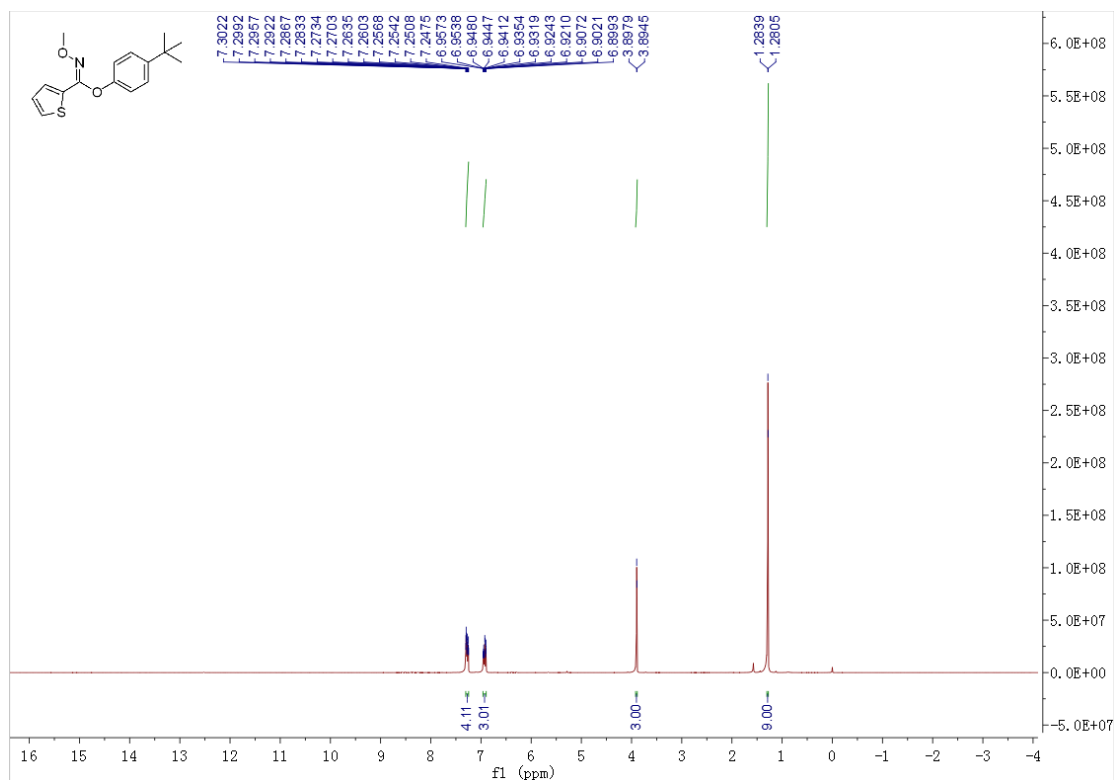

**<sup>13</sup>C NMR spectrum (400 MHz, CDCl<sub>3</sub>) of compound **3v****

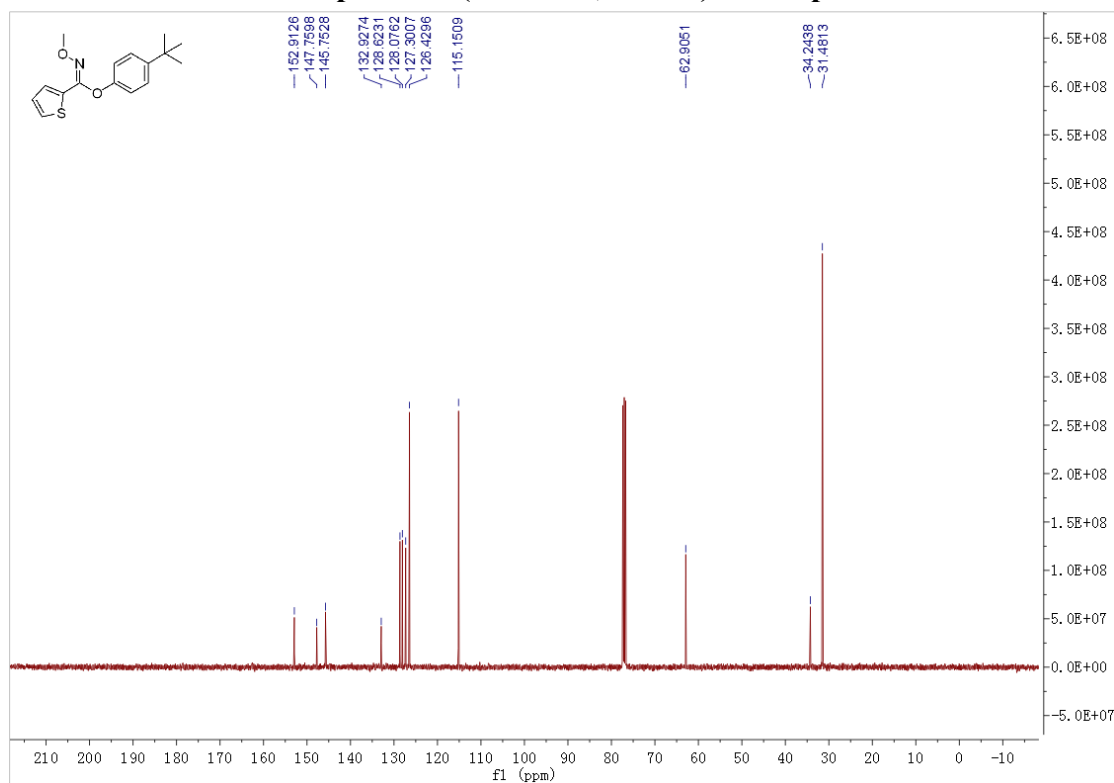

**<sup>1</sup>H NMR spectrum (400 MHz, CDCl<sub>3</sub>) of compound **3z****

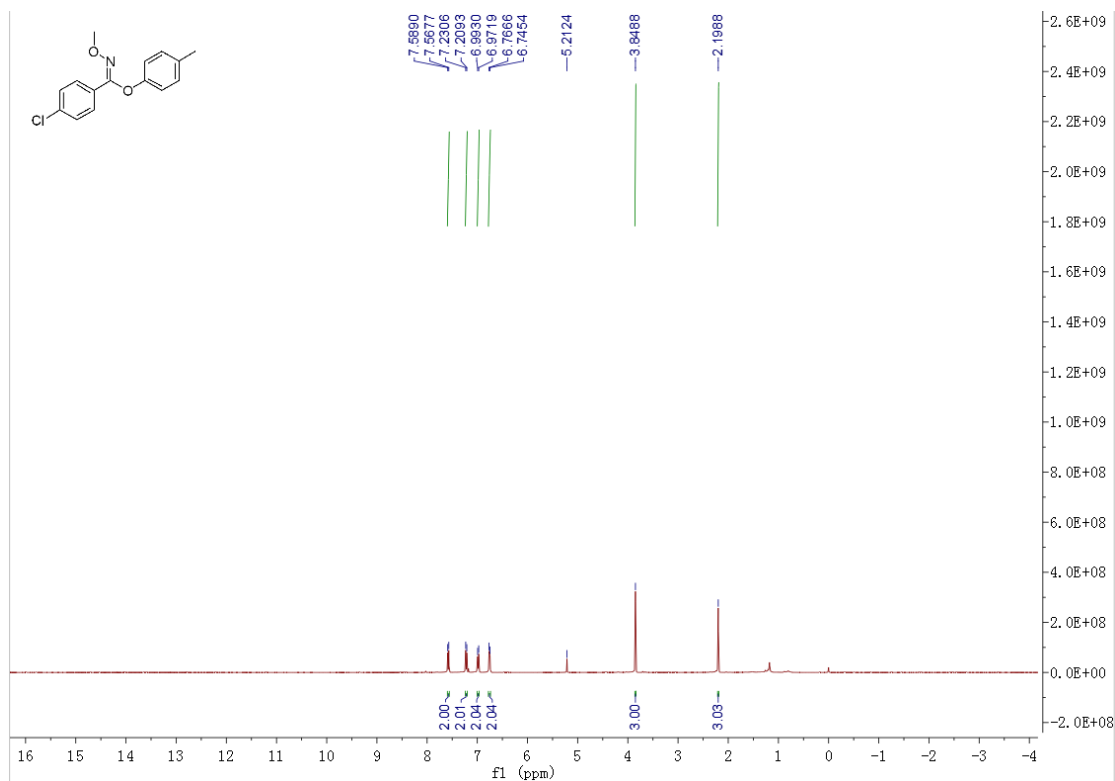

**<sup>13</sup>C NMR spectrum (400 MHz, CDCl<sub>3</sub>) of compound **3z****

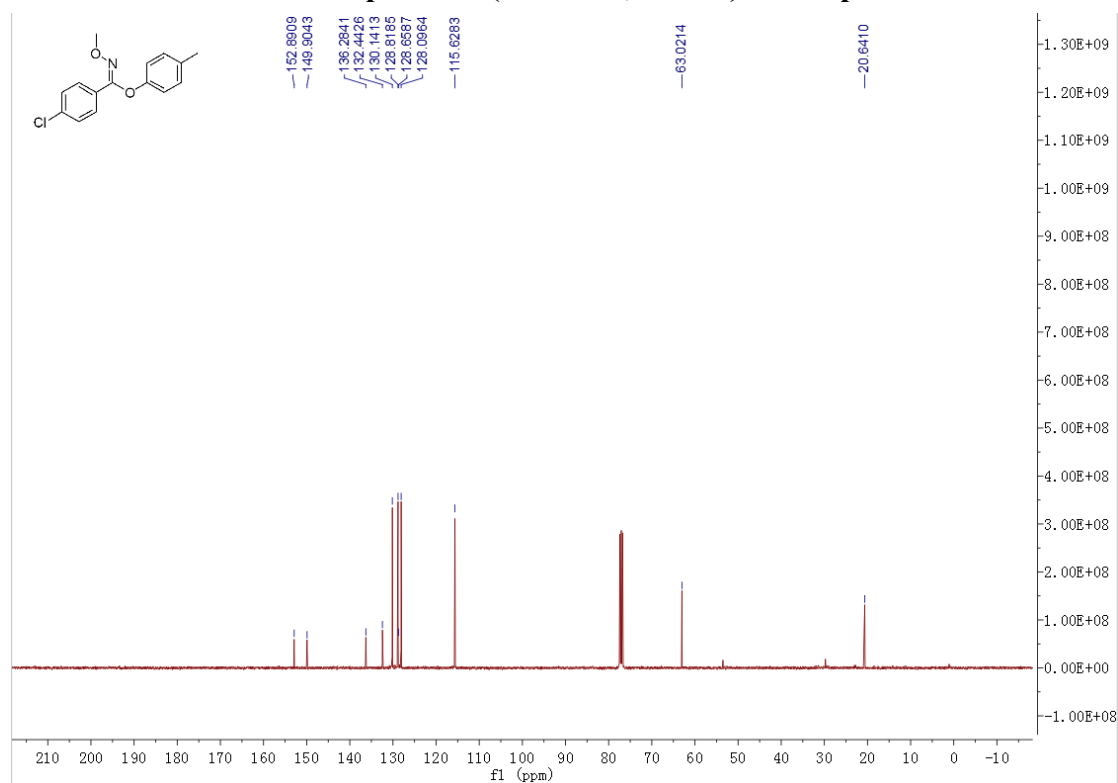

## 2. The HRMS Spectra of representative Compounds

### HRMS spectrum of compound 3a

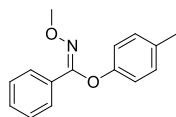

lh166

If20220624-1 11 (0.242) AM2 (Ar,20000.0,0.00,0.00)

1: TOF MS ES+  
1.93e7

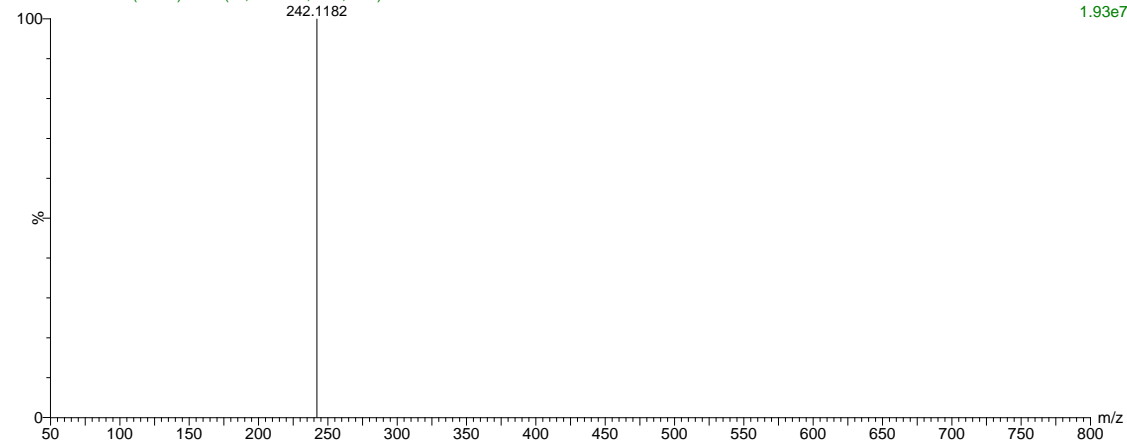

### HRMS spectrum of compound 3b

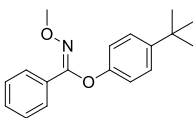

ljb-13

If20220624-2 73 (1.449) AM2 (Ar,20000.0,0.00,0.00); Cm (73-6)

1: TOF MS ES+  
1.59e6

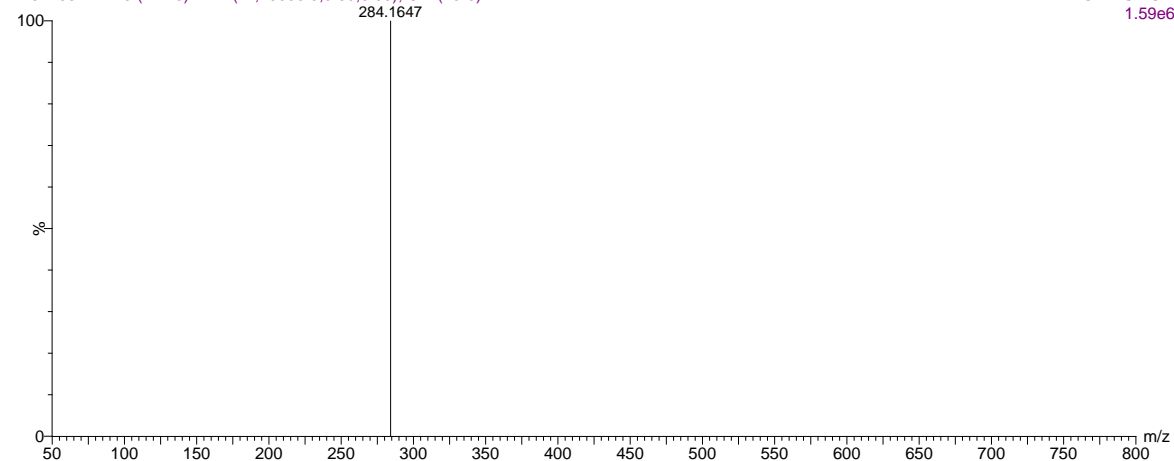

### HRMS spectrum of compound 3c

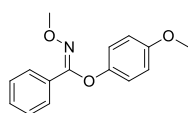

lh129

If20220624-3 43 (0.862) AM2 (Ar,20000.0,0.00,0.00); Cm (43-7)

1: TOF MS ES+  
2.30e6

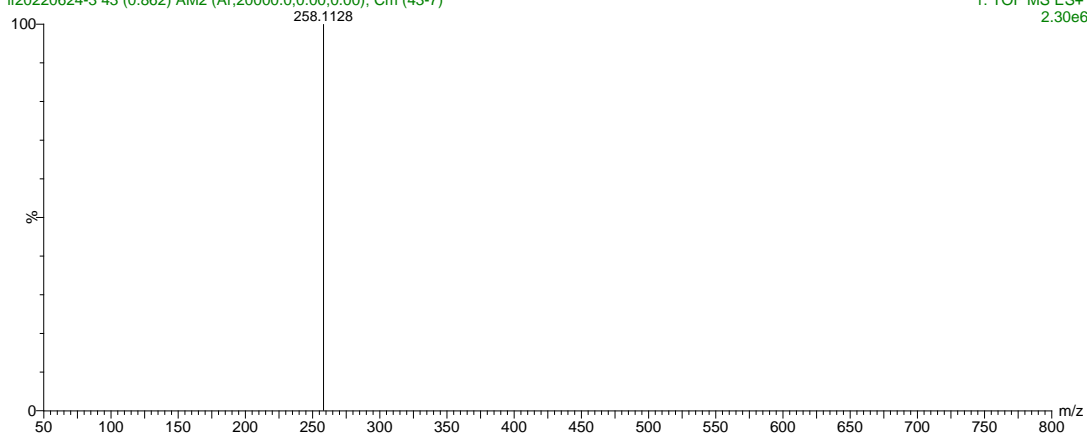

### HRMS spectrum of compound 3d

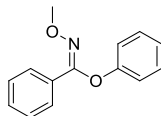

lh117

If20220624-4 48 (0.947) AM2 (Ar,20000.0,0.00,0.00); Cm (48-7)

1: TOF MS ES+  
2.88e6

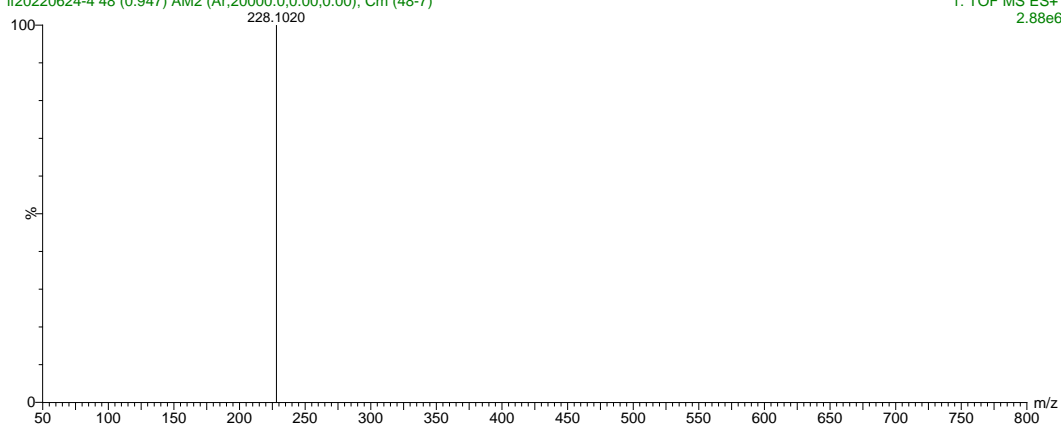

## HRMS spectrum of compound 3r

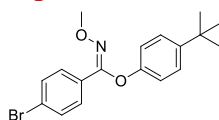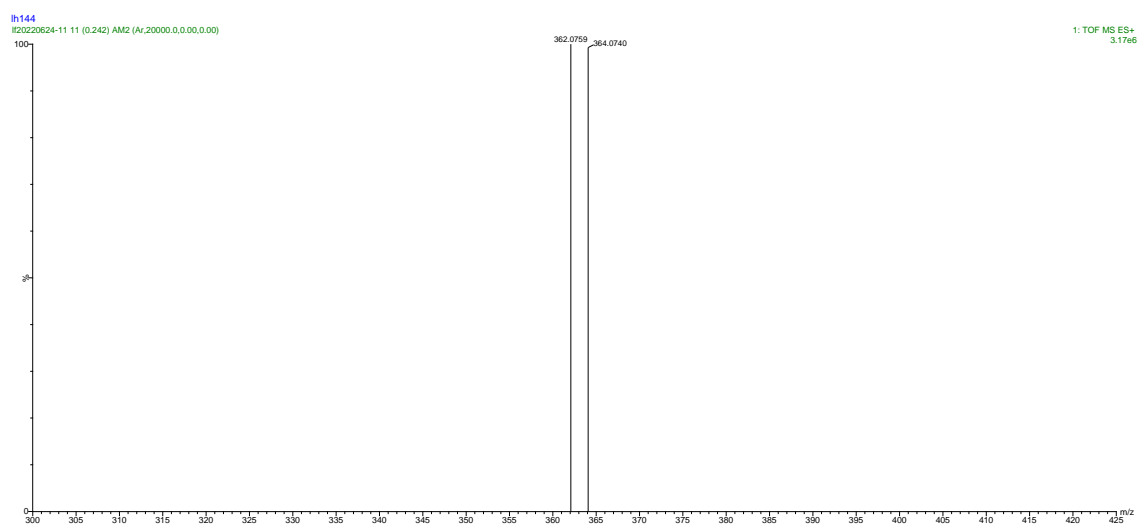

## HRMS spectrum of compound 3s

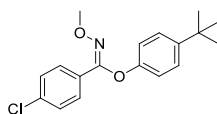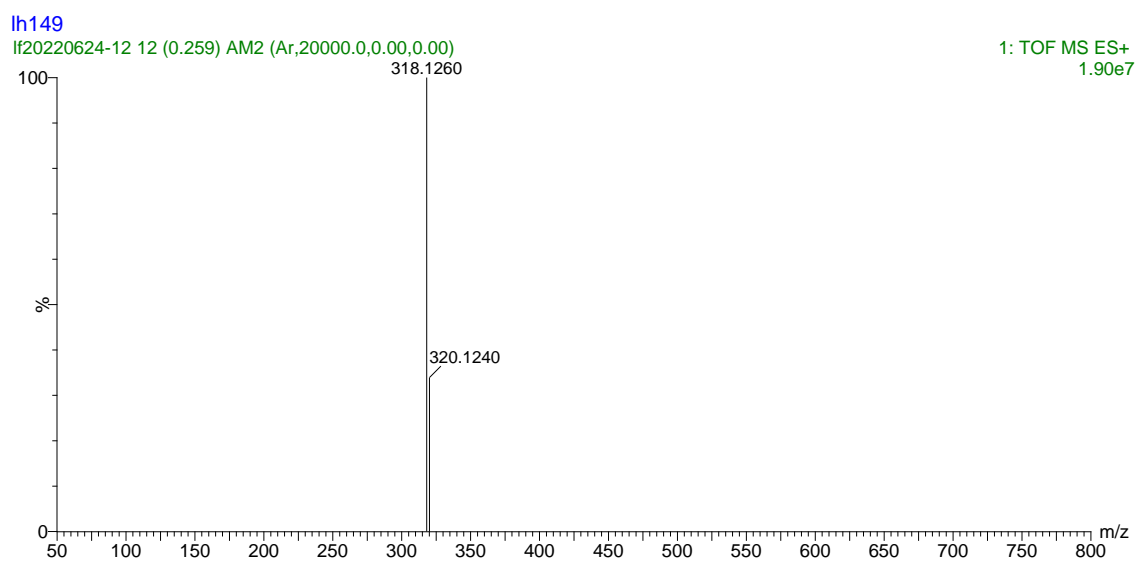

### HRMS spectrum of compound 3t

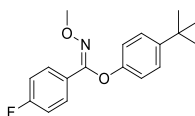

lh150

lf20220624-13 11 (0.242) AM2 (Ar,20000.0,0.00,0.00)

1: TOF MS ES+  
1.75e7

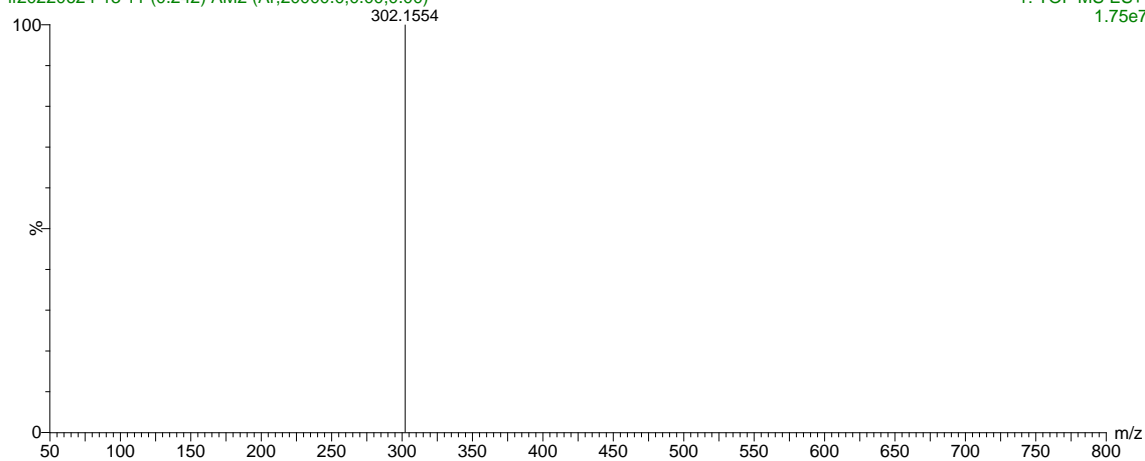

### HRMS spectrum of compound 3z

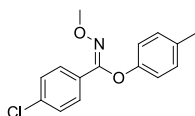

lh133

lf20220624-16 11 (0.242) AM2 (Ar,20000.0,0.00,0.00); Cm (11-6)

1: TOF MS ES+  
9.02e6

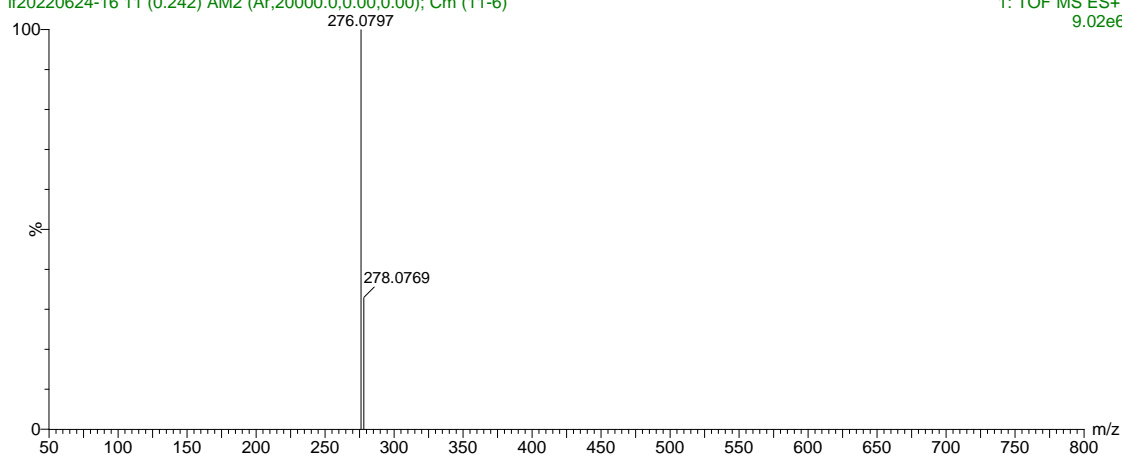

Supplement: s1 [file s1]
